# Supplementary material
Source: PubMed Central journal article supplement (PMC4787688)
Supplement: mcbd699678.ww1_default.pdf [file mcbd699678.ww1_default.pdf]

Appendix 1

| <b>Practice Characteristics</b> |                                              |                                               |
|---------------------------------|----------------------------------------------|-----------------------------------------------|
|                                 | Practices included<br>in analysis %<br>N=326 | Practices excluded<br>from analysis %<br>N=32 |
| <b>Location*</b>                |                                              |                                               |
| Inner city                      | 14.7                                         | 18.8                                          |
| Urban                           | 59.4                                         | 68.8                                          |
| Rural                           | 25.9                                         | 12.5                                          |
| <b>Townsend quintile</b>        |                                              |                                               |
| 1 (least deprived)              | 11.8                                         | 3.1                                           |
| 2                               | 13.7                                         | 15.6                                          |
| 3                               | 24.8                                         | 28.1                                          |
| 4                               | 24.8                                         | 21.9                                          |
| 5 (most deprived)               | 24.5                                         | 31.3                                          |
| <b>GP number</b>                |                                              |                                               |
| 1                               | 5.2                                          | 9.4                                           |
| 2-5                             | 31.3                                         | 46.9                                          |
| 6-10                            | 39.9                                         | 25                                            |
| >10                             | 23.6                                         | 18.8                                          |
